# Supplementary material
Source: PubMed Central journal article supplement (PMC5915331)
Supplement: NIHMS957006-supplement-Appendices.pdf [file NIHMS957006-supplement-Appendices.pdf]

Online Appendices for

**“Custodial Parole Sanctions and Earnings after Release from Prison”**

David J. Harding, Jonah A. Siegel, and Jeffrey D. Morenoff

**Matching to Unemployment Insurance Records**

To match parolees with their quarterly employment statuses, all social security numbers (SSN) available in MDOC databases for the 2003 parole cohort were sent to the Michigan Unemployment Insurance Agency and Workforce Development Agency for matching. In some cases, more than one SSN was available for each subject. For 11 individuals in the sample, MDOC had no SSN, so these individuals have no UI data and are removed from the dataset. Returned UI records were matched with names from MDOC databases, including aliases, to eliminate incorrect SSNs. Approximately five percent of the sample had no UI data match their SSN, indicating they never had any formal employment in Michigan between 1997 and 2010. If more than one SSN that MDOC had recorded for the same person matched records in the UI data, project staff selected the best match by comparing employer names listed in the UI records with those listed in the MDOC records (from parole agent reports). This procedure resulted in one-to-one matches of individual records between MDOC and UI records for more than 99% of sample members. For less than one percent of the sample, a single SSN could not be selected after matching on the parolee’s name and the name(s) of that person’s employer(s). In such cases, UI data were retained for all SSNs listed in the MDOC records for a given individual, under the assumption that such people worked under multiple SSNs.

**Supplemental Tables**

**Appendix Table A1: Full Model Estimates from Table 3**

|                                                  | (1)                  | (2)                  | (3)                      | (4)                           | (5)                  |
|--------------------------------------------------|----------------------|----------------------|--------------------------|-------------------------------|----------------------|
|                                                  | Basic RE             | Hybrid FE            | M2 +<br>time-<br>varying | M3 + time<br>interaction<br>s | M4 +<br>lagged DV    |
| <b>QUARTERLY DEVIATIONS FROM THE PERSON-MEAN</b> |                      |                      |                          |                               |                      |
| <b>Custody Variables</b>                         |                      |                      |                          |                               |                      |
| Prison at Quarter $t$                            | -1.712***<br>(0.057) | -1.646***<br>(0.060) | -1.862***<br>(0.063)     | -1.682***<br>(0.066)          | -0.749***<br>(0.035) |
| Prison at Quarter $t-1$                          | -0.090<br>(0.086)    | -0.033<br>(0.086)    | -0.256**<br>(0.086)      | -0.097<br>(0.089)             | 0.574***<br>(0.075)  |
| Prison at Quarter $t-2$                          | 0.182*<br>(0.091)    | 0.233*<br>(0.090)    | 0.047<br>(0.090)         | 0.131<br>(0.090)              | 0.119<br>(0.073)     |
| Prison at Quarter $t-3$                          | 0.043<br>(0.090)     | 0.089<br>(0.089)     | -0.076<br>(0.088)        | -0.014<br>(0.087)             | -0.017<br>(0.077)    |
| STC at Quarter $t$                               | -0.730***<br>(0.043) | -0.674***<br>(0.045) | -0.655***<br>(0.046)     | -0.603***<br>(0.046)          | -0.386***<br>(0.032) |
| STC at Quarter $t-1$                             | -0.179***<br>(0.054) | -0.131*<br>(0.054)   | -0.176**<br>(0.056)      | -0.128*<br>(0.056)            | 0.132**<br>(0.044)   |
| STC at Quarter $t-2$                             | -0.035<br>(0.060)    | 0.009<br>(0.061)     | -0.090<br>(0.060)        | -0.056<br>(0.060)             | -0.012<br>(0.048)    |
| STC at Quarter $t-3$                             | -0.074<br>(0.064)    | -0.034<br>(0.064)    | -0.109<br>(0.063)        | -0.097<br>(0.063)             | -0.121*<br>(0.052)   |
| <b>Interaction Variables</b>                     |                      |                      |                          |                               |                      |
| Prison at Quarter $t$ *STC at Quarter $t-1$      | 0.177**<br>(0.068)   | 0.135*<br>(0.068)    | 0.424***<br>(0.070)      | 0.383***<br>(0.071)           | -0.292***<br>(0.062) |
| Prison at Quarter $t$ *STC at Quarter $t-2$      | -0.153*<br>(0.070)   | -0.192**<br>(0.070)  | 0.019<br>(0.071)         | 0.023<br>(0.071)              | -0.165**<br>(0.058)  |

|                                              |           |           |           |           |           |
|----------------------------------------------|-----------|-----------|-----------|-----------|-----------|
| Prison at Quarter $t$ *STC at Quarter $t-3$  | -0.153*   | -0.186**  | -0.057    | -0.010    | 0.003     |
|                                              | (0.071)   | (0.071)   | (0.071)   | (0.071)   | (0.058)   |
| STC at Quarter $t$ * Prison at Quarter $t-1$ | -0.056    | -0.094    | -0.042    | -0.041    | -0.218    |
|                                              | (0.130)   | (0.130)   | (0.129)   | (0.130)   | (0.124)   |
| STC at Quarter $t$ * Prison at Quarter $t-2$ | -0.464*** | -0.490*** | -0.420*** | -0.365**  | -0.259*   |
|                                              | (0.128)   | (0.128)   | (0.127)   | (0.126)   | (0.119)   |
| STC at Quarter $t$ * Prison at Quarter $t-3$ | -0.006    | -0.032    | 0.036     | 0.057     | 0.064     |
|                                              | (0.143)   | (0.143)   | (0.142)   | (0.141)   | (0.132)   |
| <b>Time Variables</b>                        |           |           |           |           |           |
| Quarters Since Release                       | 0.343***  | 0.337***  | 0.396***  | 0.597***  | -0.051**  |
|                                              | (0.014)   | (0.014)   | (0.015)   | (0.025)   | (0.019)   |
| Quarters Since Release Squared               | -0.033*** | -0.032*** | -0.037*** | -0.058*** | 0.002     |
|                                              | (0.001)   | (0.001)   | (0.002)   | (0.003)   | (0.002)   |
| Quarters Since Release Cubed                 | 0.001***  | 0.001***  | 0.001***  | 0.001***  | -0.000    |
|                                              | (0.000)   | (0.000)   | (0.000)   | (0.000)   | (0.000)   |
| <b>Time-Varying Variables</b>                |           |           |           |           |           |
| Quarter 2 (April-June)                       |           |           | -0.077*** | -0.074*** | 0.109***  |
|                                              |           |           | (0.019)   | (0.019)   | (0.022)   |
| Quarter 3 (Jul-Sep)                          |           |           | 0.138***  | 0.139***  | 0.192***  |
|                                              |           |           | (0.020)   | (0.020)   | (0.022)   |
| Quarter 4 (Oct-Dec)                          |           |           | 0.044*    | 0.050*    | 0.166***  |
|                                              |           |           | (0.021)   | (0.021)   | (0.023)   |
| County Unemployment Rate (centered)          |           |           | -0.095*** | -0.093*** | -0.024*** |
|                                              |           |           | (0.010)   | (0.010)   | (0.006)   |
| Absconding Lag                               |           |           | -0.637*** | -0.586*** | -0.255*** |
|                                              |           |           | (0.042)   | (0.041)   | (0.030)   |
| Positive Substance Abuse Lag                 |           |           | 0.066     | 0.057     | -0.067    |
|                                              |           |           | (0.050)   | (0.050)   | (0.043)   |
| Arrest Lag                                   |           |           | -0.038    | -0.034    | -0.104**  |
|                                              |           |           | (0.041)   | (0.041)   | (0.037)   |
| Discharged                                   |           |           | -0.597*** | -0.566*** | -0.337*** |
|                                              |           |           | (0.056)   | (0.060)   | (0.035)   |
| Parole Violation Lag                         |           |           | 0.015     | 0.006     | -0.292*** |
|                                              |           |           | (0.034)   | (0.034)   | (0.032)   |
| <b>PERSON SPECIFIC MEANS</b>                 |           |           |           |           |           |
| <b>Custody Variables</b>                     |           |           |           |           |           |

|                                              |                      |                      |                      |                      |
|----------------------------------------------|----------------------|----------------------|----------------------|----------------------|
| Prison at Quarter $t$                        | -2.545***<br>(0.147) | -2.919***<br>(0.190) | -2.919***<br>(0.190) | -1.381***<br>(0.091) |
| Prison at Quarter $t-1$                      | -1.180<br>(2.267)    | 1.572<br>(2.294)     | 1.572<br>(2.294)     | 1.094<br>(1.116)     |
| Prison at Quarter $t-2$                      | -2.501<br>(2.886)    | -3.797<br>(2.872)    | -3.796<br>(2.873)    | -1.849<br>(1.395)    |
| Prison at Quarter $t-3$                      | -2.131<br>(2.623)    | -0.703<br>(2.636)    | -0.703<br>(2.637)    | -0.368<br>(1.269)    |
| STC at Quarter $t$                           | -2.085***<br>(0.280) | -2.100***<br>(0.306) | -2.100***<br>(0.306) | -1.061***<br>(0.152) |
| STC at Quarter $t-1$                         | -1.433<br>(1.037)    | 0.789<br>(1.009)     | 0.789<br>(1.009)     | 0.501<br>(0.528)     |
| STC at Quarter $t-2$                         | -2.115<br>(1.489)    | -1.694<br>(1.439)    | -1.694<br>(1.439)    | -0.769<br>(0.754)    |
| STC at Quarter $t-3$                         | -3.032<br>(1.710)    | -3.686*<br>(1.648)   | -3.686*<br>(1.648)   | -2.108*<br>(0.832)   |
| <b>Interaction Variables</b>                 |                      |                      |                      |                      |
| Prison at Quarter $t$ *STC at Quarter $t-1$  | 0.834<br>(2.767)     | -0.261<br>(2.865)    | -0.260<br>(2.865)    | -0.186<br>(1.351)    |
| Prison at Quarter $t$ *STC at Quarter $t-2$  | 3.865<br>(3.724)     | 2.850<br>(3.794)     | 2.850<br>(3.794)     | 1.472<br>(1.764)     |
| Prison at Quarter $t$ *STC at Quarter $t-3$  | 1.826<br>(2.908)     | 1.458<br>(2.849)     | 1.458<br>(2.849)     | 0.828<br>(1.306)     |
| STC at Quarter $t$ * Prison at Quarter $t-1$ | 5.097*<br>(2.041)    | 5.025*<br>(2.027)    | 5.025*<br>(2.028)    | 2.211*<br>(0.956)    |
| STC at Quarter $t$ * Prison at Quarter $t-2$ | -0.455<br>(2.443)    | -0.287<br>(2.542)    | -0.287<br>(2.542)    | 0.105<br>(1.221)     |
| STC at Quarter $t$ * Prison at Quarter $t-3$ | 3.973<br>(2.167)     | 4.307*<br>(2.166)    | 4.307*<br>(2.167)    | 2.107*<br>(1.036)    |
| <b>Time Variables</b>                        |                      |                      |                      |                      |
| Quarters Since Release                       | 0.741**<br>(0.276)   | 0.572*<br>(0.285)    | 0.572*<br>(0.285)    | 0.150<br>(0.270)     |
| Quarters Since Release Squared               | -0.090<br>(0.046)    | -0.052<br>(0.045)    | -0.052<br>(0.045)    | -0.014<br>(0.037)    |
| Quarters Since Release Cubed                 | 0.003<br>(0.002)     | 0.001<br>(0.002)     | 0.001<br>(0.002)     | 0.000<br>(0.001)     |

**Time-Varying Variables**

|                                          |                      |                      |                      |
|------------------------------------------|----------------------|----------------------|----------------------|
| Quarter 2 (April-June)                   | 2.563<br>(1.464)     | 2.561<br>(1.463)     | -1.381***<br>(0.091) |
| Quarter 3 (Jul-Sep)                      | 2.585*<br>(1.025)    | 2.582*<br>(1.024)    | 1.094<br>(1.116)     |
| Quarter 4 (Oct-Dec)                      | 2.529*<br>(1.217)    | 2.527*<br>(1.216)    | -1.849<br>(1.395)    |
| County Unemployment Rate (centered)      | -0.147***<br>(0.027) | -0.147***<br>(0.027) | -0.368<br>(1.269)    |
| Absconding Lag                           | -1.958***<br>(0.225) | -1.958***<br>(0.225) | -1.061***<br>(0.152) |
| Positive Substance Abuse Lag             | -1.117<br>(0.608)    | -1.117<br>(0.608)    | 0.501<br>(0.528)     |
| Arrest Lag                               | -1.276*<br>(0.614)   | -1.276*<br>(0.614)   | -0.769<br>(0.754)    |
| Discharged                               | -0.416*<br>(0.182)   | -0.416*<br>(0.182)   | -2.108*<br>(0.832)   |
| Parole Violation Lag                     | 0.625<br>(0.460)     | 0.625<br>(0.460)     | -0.186<br>(1.351)    |
| <b>TIME BY CUSTODY MEAN INTERACTIONS</b> |                      |                      |                      |
| Quarters* Prison at Quarter $t$          |                      | -0.322***<br>(0.046) | 1.472<br>(1.764)     |
| Quarters* Prison at Quarter $t-1$        |                      | -0.899<br>(0.839)    | 0.828<br>(1.306)     |
| Quarters* Prison at Quarter $t-2$        |                      | 0.067<br>(1.292)     | 2.211*<br>(0.956)    |
| Quarters* Prison at Quarter $t-3$        |                      | -1.362<br>(1.016)    | 0.105<br>(1.221)     |
| Quarters*STC at Quarter $t$              |                      | -0.219*<br>(0.105)   | 2.107*<br>(1.036)    |
| Quarters*STC at Quarter $t-1$            |                      | -0.463<br>(0.470)    | 0.150<br>(0.270)     |
| Quarters*STC at Quarter $t-2$            |                      | -0.818<br>(0.710)    | -0.014<br>(0.037)    |
| Quarters*STC at Quarter $t-3$            |                      | -0.119<br>(0.683)    | 0.000<br>(0.001)     |

|                                      |                      |                      |
|--------------------------------------|----------------------|----------------------|
| Quarters Sq* Prison at Quarter $t$   | 0.027***<br>(0.005)  | 1.862<br>(1.037)     |
| Quarters Sq* Prison at Quarter $t-1$ | 0.118<br>(0.092)     | 2.138*<br>(0.972)    |
| Quarters Sq* Prison at Quarter $t-2$ | -0.064<br>(0.143)    | 1.232<br>(1.029)     |
| Quarters Sq* Prison at Quarter $t-3$ | 0.145<br>(0.115)     | -0.072***<br>(0.013) |
| Quarters Sq*STC at Quarter $t$       | 0.026*<br>(0.011)    | -0.912***<br>(0.109) |
| Quarters Sq*STC at Quarter $t-1$     | 0.022<br>(0.052)     | -0.529<br>(0.294)    |
| Quarters Sq*STC at Quarter $t-2$     | 0.061<br>(0.080)     | -0.571<br>(0.293)    |
| Quarters Sq*STC at Quarter $t-3$     | 0.095<br>(0.076)     | -0.225**<br>(0.087)  |
| Quarters Cu* Prison at Quarter $t$   | -0.001***<br>(0.000) | 0.244<br>(0.222)     |
| Quarters Cu* Prison at Quarter $t-1$ | -0.005<br>(0.003)    | -0.008***<br>(0.002) |
| Quarters Cu* Prison at Quarter $t-2$ | 0.003<br>(0.004)     | 0.004<br>(0.003)     |
| Quarters Cu* Prison at Quarter $t-3$ | -0.004<br>(0.003)    | -0.001<br>(0.002)    |
| Quarters Cu*STC at Quarter $t$       | -0.001*<br>(0.000)   | 0.000<br>(0.000)     |
| Quarters Cu*STC at Quarter $t-1$     | -0.000<br>(0.002)    | -0.001<br>(0.001)    |
| Quarters Cu*STC at Quarter $t-2$     | -0.001<br>(0.002)    | -0.001<br>(0.002)    |
| Quarters Cu*STC at Quarter $t-3$     | -0.004<br>(0.002)    | 0.002<br>(0.002)     |
| Lagged Ln Quarterly Earnings         |                      | 0.559***<br>(0.006)  |

|          |                     |                     |                   |                   |                   |
|----------|---------------------|---------------------|-------------------|-------------------|-------------------|
| Constant | 1.720***<br>(0.039) | 1.328***<br>(0.227) | -0.392<br>(0.682) | -0.391<br>(0.681) | -0.215<br>(0.686) |
|----------|---------------------|---------------------|-------------------|-------------------|-------------------|

---

notes: \*\*\*  $p < 0.001$ , \*\*  $p < 0.01$ , \*  $p < 0.05$

Robust standard errors in parentheses

**Appendix Table A2: Full Model Estimates from Table 4**

|                                                  | Pre-Prison Employment |                      | Race                 |                      | Times In Prison      |                      |
|--------------------------------------------------|-----------------------|----------------------|----------------------|----------------------|----------------------|----------------------|
|                                                  | No                    | Yes                  | White                | Black                | First                | > First              |
| <b>QUARTERLY DEVIATIONS FROM THE PERSON-MEAN</b> |                       |                      |                      |                      |                      |                      |
| <b>Custody Variables</b>                         |                       |                      |                      |                      |                      |                      |
| Prison at Quarter $t$                            | -0.657***<br>(0.040)  | -1.067***<br>(0.104) | -0.992***<br>(0.059) | -0.563***<br>(0.041) | -0.700***<br>(0.060) | -0.755***<br>(0.044) |
| Prison at Quarter $t-1$                          | 0.640***<br>(0.087)   | 0.440*<br>(0.211)    | 0.890***<br>(0.132)  | 0.328***<br>(0.087)  | 0.598***<br>(0.140)  | 0.565***<br>(0.089)  |
| Prison at Quarter $t-2$                          | 0.120<br>(0.084)      | 0.234<br>(0.213)     | 0.205<br>(0.130)     | 0.038<br>(0.085)     | 0.113<br>(0.129)     | 0.126<br>(0.089)     |
| Prison at Quarter $t-3$                          | 0.025<br>(0.088)      | -0.049<br>(0.194)    | -0.148<br>(0.131)    | 0.101<br>(0.092)     | -0.128<br>(0.121)    | 0.044<br>(0.098)     |
| STC at Quarter $t$                               | -0.324***<br>(0.036)  | -0.568***<br>(0.091) | -0.454***<br>(0.057) | -0.339***<br>(0.037) | -0.400***<br>(0.049) | -0.373***<br>(0.041) |
| STC at Quarter $t-1$                             | 0.247***<br>(0.050)   | -0.190<br>(0.130)    | 0.191*<br>(0.078)    | 0.087<br>(0.053)     | 0.115<br>(0.066)     | 0.149*<br>(0.060)    |
| STC at Quarter $t-2$                             | 0.012<br>(0.053)      | 0.007<br>(0.155)     | 0.034<br>(0.082)     | -0.060<br>(0.058)    | -0.008<br>(0.069)    | -0.012<br>(0.068)    |
| STC at Quarter $t-3$                             | -0.063<br>(0.060)     | -0.303*<br>(0.141)   | -0.084<br>(0.088)    | -0.150*<br>(0.064)   | -0.106<br>(0.072)    | -0.134<br>(0.077)    |
| <b>Interaction Variables</b>                     |                       |                      |                      |                      |                      |                      |
| Prison at Quarter $t$ *STC at Quarter $t-1$      | -0.369***<br>(0.069)  | 0.080<br>(0.179)     | -0.476***<br>(0.110) | -0.166*<br>(0.070)   | -0.266*<br>(0.114)   | -0.305***<br>(0.076) |
| Prison at Quarter $t$ *STC at Quarter $t-2$      | -0.191**<br>(0.064)   | -0.226<br>(0.187)    | -0.279**<br>(0.100)  | -0.075<br>(0.068)    | -0.339**<br>(0.108)  | -0.114<br>(0.076)    |
| Prison at Quarter $t$ *STC at Quarter $t-3$      | -0.049<br>(0.066)     | 0.088<br>(0.157)     | -0.127<br>(0.098)    | 0.080<br>(0.070)     | -0.074<br>(0.094)    | 0.033<br>(0.082)     |
| STC at Quarter $t$ * Prison at Quarter $t-1$     | -0.272                | -0.300               | -0.306               | -0.129               | -0.206               | -0.227               |



|                                              |                      |                      |                      |                      |                      |                      |
|----------------------------------------------|----------------------|----------------------|----------------------|----------------------|----------------------|----------------------|
| STC at Quarter $t^*$ Prison at Quarter $t-2$ | (0.141)<br>-0.307*   | (0.376)<br>-0.089    | (0.229)<br>-0.421    | (0.139)<br>-0.132    | (0.247)<br>-0.254    | (0.145)<br>-0.271*   |
| STC at Quarter $t^*$ Prison at Quarter $t-3$ | (0.133)<br>0.109     | (0.379)<br>-0.224    | (0.220)<br>0.123     | (0.129)<br>0.007     | (0.258)<br>0.278     | (0.135)<br>-0.032    |
|                                              | (0.150)              | (0.405)              | (0.234)              | (0.151)              | (0.308)              | (0.148)              |
| <b>Time Variables</b>                        |                      |                      |                      |                      |                      |                      |
| Quarters Since Release                       | -0.061**<br>(0.023)  | -0.034<br>(0.054)    | -0.108***<br>(0.030) | 0.005<br>(0.025)     | -0.040<br>(0.025)    | -0.066*<br>(0.029)   |
| Quarters Since Release Squared               | 0.003<br>(0.002)     | -0.000<br>(0.005)    | 0.006*<br>(0.003)    | -0.003<br>(0.002)    | 0.001<br>(0.002)     | 0.002<br>(0.003)     |
| Quarters Since Release Cubed                 | -0.000<br>(0.000)    | -0.000<br>(0.000)    | -0.000<br>(0.000)    | 0.000<br>(0.000)     | -0.000<br>(0.000)    | -0.000<br>(0.000)    |
| <b>Time-Varying Variables</b>                |                      |                      |                      |                      |                      |                      |
| Quarter 2 (April-June)                       | 0.088***<br>(0.025)  | 0.072<br>(0.062)     | 0.100**<br>(0.037)   | 0.100***<br>(0.027)  | 0.142***<br>(0.035)  | 0.078**<br>(0.028)   |
| Quarter 3 (Jul-Sep)                          | 0.180***<br>(0.025)  | 0.127*<br>(0.063)    | 0.191***<br>(0.036)  | 0.171***<br>(0.027)  | 0.213***<br>(0.035)  | 0.174***<br>(0.028)  |
| Quarter 4 (Oct-Dec)                          | 0.148***<br>(0.026)  | 0.124<br>(0.068)     | 0.169***<br>(0.038)  | 0.152***<br>(0.029)  | 0.183***<br>(0.035)  | 0.150***<br>(0.030)  |
| County Unemployment Rate (centered)          | -0.024***<br>(0.007) | -0.018<br>(0.016)    | -0.035***<br>(0.009) | -0.015<br>(0.008)    | -0.031***<br>(0.009) | -0.018*<br>(0.008)   |
| Absconding Lag                               | -0.245***<br>(0.033) | -0.350***<br>(0.091) | -0.325***<br>(0.059) | -0.227***<br>(0.034) | -0.266***<br>(0.052) | -0.251***<br>(0.037) |
| Positive Substance Abuse Lag                 | -0.084<br>(0.050)    | 0.048<br>(0.124)     | 0.016<br>(0.082)     | -0.096<br>(0.050)    | -0.121<br>(0.073)    | -0.032<br>(0.053)    |
| Arrest Lag                                   | -0.115**<br>(0.041)  | -0.161<br>(0.114)    | -0.176*<br>(0.069)   | -0.046<br>(0.041)    | -0.075<br>(0.059)    | -0.124**<br>(0.047)  |
| Discharged                                   | -0.289***<br>(0.040) | -0.462***<br>(0.104) | -0.369***<br>(0.055) | -0.301***<br>(0.045) | -0.333***<br>(0.048) | -0.345***<br>(0.050) |
| Parole Violation Lag                         | -0.274***<br>(0.036) | -0.376***<br>(0.088) | -0.429***<br>(0.058) | -0.181***<br>(0.036) | -0.264***<br>(0.058) | -0.311***<br>(0.037) |
| <b>PERSON SPECIFIC MEANS</b>                 |                      |                      |                      |                      |                      |                      |
| <b>Custody Variables</b>                     |                      |                      |                      |                      |                      |                      |
| Prison at Quarter $t$                        | -1.317***<br>(0.106) | -1.360***<br>(0.284) | -1.735***<br>(0.147) | -1.085***<br>(0.114) | -1.568***<br>(0.170) | -1.150***<br>(0.115) |
| Prison at Quarter $t-1$                      | 2.286                | -5.425               | 1.774                | 0.956                | 2.841                | 0.777                |

|                                              |           |           |           |           |           |           |
|----------------------------------------------|-----------|-----------|-----------|-----------|-----------|-----------|
|                                              | (1.340)   | (3.809)   | (1.932)   | (1.380)   | (2.291)   | (1.297)   |
| Prison at Quarter $t-2$                      | -2.728    | 1.256     | -2.153    | -2.029    | -4.900    | -0.733    |
|                                              | (1.529)   | (5.440)   | (2.130)   | (1.896)   | (2.968)   | (1.608)   |
| Prison at Quarter $t-3$                      | 0.290     | -0.818    | -0.995    | 0.192     | -2.439    | 0.959     |
|                                              | (1.420)   | (5.056)   | (2.218)   | (1.555)   | (2.490)   | (1.464)   |
| STC at Quarter $t$                           | -0.835*** | -2.028*** | -0.944*** | -1.007*** | -1.262*** | -0.845*** |
|                                              | (0.179)   | (0.413)   | (0.280)   | (0.160)   | (0.248)   | (0.178)   |
| STC at Quarter $t-1$                         | 0.173     | 1.833     | 0.122     | 0.593     | 1.870*    | -0.533    |
|                                              | (0.536)   | (1.931)   | (1.040)   | (0.562)   | (0.880)   | (0.589)   |
| STC at Quarter $t-2$                         | -1.074    | 2.750     | -1.196    | -0.426    | -1.362    | -0.123    |
|                                              | (0.792)   | (3.293)   | (1.481)   | (0.805)   | (1.353)   | (0.904)   |
| STC at Quarter $t-3$                         | -0.690    | -8.085**  | -1.479    | -2.153*   | -3.178*   | -0.988    |
|                                              | (0.882)   | (3.115)   | (1.552)   | (0.917)   | (1.280)   | (1.105)   |
| <b>Interaction Variables</b>                 |           |           |           |           |           |           |
| Prison at Quarter $t$ *STC at Quarter $t-1$  | -1.517    | 4.111     | -1.059    | -0.068    | -0.143    | 0.262     |
|                                              | (1.512)   | (4.602)   | (2.001)   | (1.785)   | (2.051)   | (1.777)   |
| Prison at Quarter $t$ *STC at Quarter $t-2$  | 2.990     | -9.131    | 3.523     | 0.215     | 3.368     | -0.187    |
|                                              | (1.960)   | (6.674)   | (3.105)   | (2.054)   | (2.742)   | (2.355)   |
| Prison at Quarter $t$ *STC at Quarter $t-3$  | 0.226     | 6.668     | 0.162     | 1.413     | 0.460     | 0.788     |
|                                              | (1.463)   | (5.308)   | (2.532)   | (1.339)   | (2.159)   | (1.686)   |
| STC at Quarter $t$ * Prison at Quarter $t-1$ | 1.073     | 9.052*    | 4.308**   | 1.201     | 3.297     | 1.470     |
|                                              | (1.084)   | (3.603)   | (1.590)   | (1.196)   | (1.764)   | (1.149)   |
| STC at Quarter $t$ * Prison at Quarter $t-2$ | 0.891     | -3.786    | -2.420    | 1.382     | 1.680     | -0.662    |
|                                              | (1.295)   | (5.049)   | (2.042)   | (1.474)   | (2.207)   | (1.475)   |
| STC at Quarter $t$ * Prison at Quarter $t-3$ | 1.107     | 4.918     | 3.741*    | 1.123     | 2.947     | 1.069     |
|                                              | (1.123)   | (4.310)   | (1.648)   | (1.291)   | (2.102)   | (1.179)   |
| <b>Time Variables</b>                        |           |           |           |           |           |           |
| Quarters Since Release                       | 0.199     | 0.448     | 0.088     | -0.005    | 0.942*    | -0.241    |
|                                              | (0.295)   | (0.631)   | (0.582)   | (0.230)   | (0.453)   | (0.287)   |
| Quarters Since Release Squared               | -0.027    | -0.058    | -0.017    | 0.013     | -0.116    | 0.032     |
|                                              | (0.041)   | (0.094)   | (0.079)   | (0.029)   | (0.065)   | (0.037)   |
| Quarters Since Release Cubed                 | 0.001     | 0.002     | 0.001     | -0.001    | 0.004     | -0.001    |
|                                              | (0.001)   | (0.003)   | (0.003)   | (0.001)   | (0.002)   | (0.001)   |
| <b>Time-Varying Variables</b>                |           |           |           |           |           |           |
| Quarter 2 (April-June)                       | 2.555*    | 3.769     | 1.517     | 1.356     | 4.345*    | 0.232     |
|                                              | (1.143)   | (3.125)   | (1.667)   | (1.355)   | (1.711)   | (1.266)   |

|                                      |                      |                    |                      |                      |                      |                      |
|--------------------------------------|----------------------|--------------------|----------------------|----------------------|----------------------|----------------------|
| Quarter 3 (Jul-Sep)                  | 3.017**<br>(1.082)   | 3.831<br>(3.167)   | 2.858<br>(1.691)     | 0.713<br>(1.106)     | 3.048<br>(1.597)     | 1.332<br>(1.213)     |
| Quarter 4 (Oct-Dec)                  | 1.046<br>(1.115)     | 6.686*<br>(3.052)  | 0.741<br>(1.767)     | 0.499<br>(1.238)     | 1.340<br>(1.613)     | 1.078<br>(1.310)     |
| County Unemployment Rate (centered)  | -0.066***<br>(0.015) | -0.099*<br>(0.041) | -0.058**<br>(0.020)  | -0.055**<br>(0.018)  | -0.069***<br>(0.021) | -0.068***<br>(0.016) |
| Absconding Lag                       | -0.898***<br>(0.120) | -0.953*<br>(0.423) | -1.437***<br>(0.187) | -0.531***<br>(0.132) | -1.241***<br>(0.169) | -0.650***<br>(0.141) |
| Positive Substance Abuse Lag         | -0.449<br>(0.325)    | -0.575<br>(1.132)  | 0.362<br>(0.582)     | -0.440<br>(0.346)    | -0.887<br>(0.459)    | -0.278<br>(0.388)    |
| Arrest Lag                           | -0.506<br>(0.308)    | -0.435<br>(1.156)  | -0.115<br>(0.539)    | -0.572<br>(0.348)    | -0.716<br>(0.463)    | -0.413<br>(0.372)    |
| Discharged                           | -0.218*<br>(0.102)   | -0.184<br>(0.245)  | -0.525***<br>(0.142) | -0.022<br>(0.104)    | -0.410**<br>(0.154)  | -0.096<br>(0.096)    |
| Parole Violation Lag                 | 0.240<br>(0.247)     | 1.072<br>(0.707)   | -0.245<br>(0.392)    | 0.236<br>(0.259)     | 0.220<br>(0.346)     | 0.244<br>(0.281)     |
| TIME BY CUSTODY MEAN INTERACTIONS    |                      |                    |                      |                      |                      |                      |
| Quarters* Prison at Quarter $t$      | -0.055<br>(0.045)    | -0.143<br>(0.121)  | -0.158*<br>(0.066)   | -0.033<br>(0.046)    | -0.155<br>(0.084)    | -0.056<br>(0.048)    |
| Quarters* Prison at Quarter $t-1$    | -1.725*<br>(0.863)   | -3.196<br>(2.542)  | -2.470<br>(1.349)    | -2.374**<br>(0.904)  | -1.705<br>(1.500)    | -2.409**<br>(0.885)  |
| Quarters* Prison at Quarter $t-2$    | 0.298<br>(1.340)     | 4.091<br>(3.404)   | 1.032<br>(1.942)     | 1.122<br>(1.484)     | -1.149<br>(2.462)    | 1.368<br>(1.386)     |
| Quarters* Prison at Quarter $t-3$    | 0.272<br>(1.092)     | -4.269<br>(2.207)  | -0.129<br>(1.600)    | -0.207<br>(1.109)    | 1.098<br>(2.222)     | -0.344<br>(1.029)    |
| Quarters*STC at Quarter $t$          | 0.148<br>(0.092)     | 0.336<br>(0.209)   | 0.294*<br>(0.143)    | 0.046<br>(0.097)     | 0.279*<br>(0.127)    | 0.101<br>(0.106)     |
| Quarters*STC at Quarter $t-1$        | -0.604<br>(0.438)    | 0.835<br>(1.089)   | 0.427<br>(0.748)     | -0.652<br>(0.443)    | -0.837<br>(0.648)    | 0.140<br>(0.487)     |
| Quarters*STC at Quarter $t-2$        | -0.358<br>(0.678)    | -3.047<br>(2.215)  | -2.226<br>(1.245)    | 0.449<br>(0.683)     | -1.080<br>(1.153)    | -0.137<br>(0.739)    |
| Quarters*STC at Quarter $t-3$        | 1.704**<br>(0.632)   | 2.671<br>(1.883)   | 3.152**<br>(1.126)   | 0.387<br>(0.638)     | 2.510**<br>(0.956)   | 0.715<br>(0.725)     |
| Quarters Sq* Prison at Quarter $t$   | 0.004<br>(0.004)     | 0.009<br>(0.011)   | 0.015*<br>(0.006)    | 0.002<br>(0.004)     | 0.012<br>(0.008)     | 0.006<br>(0.004)     |
| Quarters Sq* Prison at Quarter $t-1$ | 0.209*<br>(0.209)    | 0.333<br>(0.333)   | 0.298*<br>(0.298)    | 0.225**<br>(0.225)   | 0.189<br>(0.189)     | 0.262**<br>(0.262)   |

|                                      |          |          |          |          |          |           |
|--------------------------------------|----------|----------|----------|----------|----------|-----------|
|                                      | (0.083)  | (0.229)  | (0.129)  | (0.083)  | (0.152)  | (0.082)   |
| Quarters Sq* Prison at Quarter $t-2$ | -0.093   | -0.280   | -0.203   | -0.071   | -0.022   | -0.144    |
|                                      | (0.127)  | (0.330)  | (0.184)  | (0.139)  | (0.228)  | (0.130)   |
| Quarters Sq* Prison at Quarter $t-3$ | 0.019    | 0.291    | 0.082    | -0.007   | 0.010    | 0.038     |
|                                      | (0.104)  | (0.232)  | (0.149)  | (0.106)  | (0.195)  | (0.099)   |
| Quarters Sq*STC at Quarter $t$       | -0.013   | -0.025   | -0.023   | -0.003   | -0.022   | -0.007    |
|                                      | (0.009)  | (0.020)  | (0.014)  | (0.009)  | (0.013)  | (0.011)   |
| Quarters Sq*STC at Quarter $t-1$     | 0.046    | -0.086   | -0.044   | 0.059    | 0.062    | -0.011    |
|                                      | (0.044)  | (0.112)  | (0.075)  | (0.044)  | (0.066)  | (0.048)   |
| Quarters Sq*STC at Quarter $t-2$     | 0.027    | 0.270    | 0.193    | -0.050   | 0.102    | 0.002     |
|                                      | (0.067)  | (0.212)  | (0.121)  | (0.067)  | (0.111)  | (0.073)   |
| Quarters Sq*STC at Quarter $t-3$     | -0.117   | -0.189   | -0.250*  | -0.002   | -0.193*  | -0.032    |
|                                      | (0.062)  | (0.180)  | (0.109)  | (0.062)  | (0.091)  | (0.071)   |
| Quarters Cu* Prison at Quarter $t$   | -0.000   | -0.000   | -0.000*  | 0.000    | -0.000   | -0.000    |
|                                      | (0.000)  | (0.000)  | (0.000)  | (0.000)  | (0.000)  | (0.000)   |
| Quarters Cu* Prison at Quarter $t-1$ | -0.007** | -0.010   | -0.010** | -0.007** | -0.006   | -0.008*** |
|                                      | (0.002)  | (0.006)  | (0.004)  | (0.002)  | (0.004)  | (0.002)   |
| Quarters Cu* Prison at Quarter $t-2$ | 0.004    | 0.006    | 0.008    | 0.002    | 0.004    | 0.005     |
|                                      | (0.003)  | (0.009)  | (0.005)  | (0.004)  | (0.006)  | (0.004)   |
| Quarters Cu* Prison at Quarter $t-3$ | -0.001   | -0.005   | -0.003   | 0.001    | -0.002   | -0.001    |
|                                      | (0.003)  | (0.007)  | (0.004)  | (0.003)  | (0.005)  | (0.003)   |
| Quarters Cu*STC at Quarter $t$       | 0.000    | 0.001    | 0.000    | 0.000    | 0.001    | 0.000     |
|                                      | (0.000)  | (0.001)  | (0.000)  | (0.000)  | (0.000)  | (0.000)   |
| Quarters Cu*STC at Quarter $t-1$     | -0.001   | 0.002    | 0.001    | -0.002   | -0.001   | 0.000     |
|                                      | (0.001)  | (0.003)  | (0.002)  | (0.001)  | (0.002)  | (0.001)   |
| Quarters Cu*STC at Quarter $t-2$     | -0.000   | -0.007   | -0.005   | 0.002    | -0.003   | 0.000     |
|                                      | (0.002)  | (0.006)  | (0.003)  | (0.002)  | (0.003)  | (0.002)   |
| Quarters Cu*STC at Quarter $t-3$     | 0.002    | 0.004    | 0.006*   | -0.000   | 0.005    | 0.000     |
|                                      | (0.002)  | (0.005)  | (0.003)  | (0.002)  | (0.002)  | (0.002)   |
| Lagged Ln Quarterly Earnings         | 0.548*** | 0.558*** | 0.560*** | 0.557*** | 0.558*** | 0.561***  |
|                                      | (0.007)  | (0.014)  | (0.008)  | (0.009)  | (0.008)  | (0.009)   |
| Constant                             | -0.556   | -3.020   | 0.491    | 0.022    | -1.847   | 0.680     |
|                                      | (0.729)  | (1.851)  | (1.143)  | (0.874)  | (1.069)  | (0.844)   |

---

|                   |        |        |        |        |        |        |
|-------------------|--------|--------|--------|--------|--------|--------|
| n person-quarters | 63,692 | 12,989 | 40,735 | 47,849 | 43,276 | 47,133 |
|-------------------|--------|--------|--------|--------|--------|--------|

notes: \*\*\*  $p < 0.001$ , \*\*  $p < 0.01$ , \*  $p < 0.05$

*Robust standard errors in parentheses*

**Appendix Table A3: Falsification Test Based on STC Leads (n=3,673 individuals, 90,418 person quarters)**

|                              | Model 5<br>from Table 3 | Model 5<br>with<br>Leads |
|------------------------------|-------------------------|--------------------------|
| <b>Key Custody Variables</b> |                         |                          |
| Prison at Quarter $t$        | -0.749***<br>(0.035)    | -0.762***<br>(0.037)     |
| Prison at Quarter $t-1$      | 0.574***<br>(0.075)     | 0.562***<br>(0.076)      |
| Prison at Quarter $t-2$      | 0.119<br>(0.073)        | 0.110<br>(0.074)         |
| Prison at Quarter $t-3$      | -0.017<br>(0.077)       | -0.026<br>(0.077)        |
| STC at Quarter $t$           | -0.386***<br>(0.032)    | -0.404***<br>(0.034)     |
| STC at Quarter $t-1$         | 0.132**<br>(0.044)      | 0.116*<br>(0.046)        |
| STC at Quarter $t-2$         | -0.012<br>(0.048)       | -0.028<br>(0.050)        |
| STC at Quarter $t-3$         | -0.121*<br>(0.052)      | -0.135*<br>(0.054)       |
| <b>STC Lead Variables</b>    |                         |                          |
| STC at Quarter $t+1$         |                         | 0.096<br>(0.059)         |
| STC at Quarter $t+2$         |                         | -0.026<br>(0.069)        |
| STC at Quarter $t+3$         |                         | 0.111<br>(0.078)         |

notes: \*\*\*  $p < 0.001$ , \*\*  $p < 0.01$ , \*  $p < 0.05$ ; Robust standard errors in parentheses
